# Supplementary material for: ZIF-8-incorporated Cellulose Air Filter for Carbon Dioxide Capture
Source: Research Square preprint supplement (doi:10.21203/rs.3.rs-3221089/v1), 2023-08-09
Supplement: Supplementary file 1 [file fce8668770b668f70d4c6a5f.docx]

**Supplementary Data for ZIF-8**

| **Sr.No** | **Samples** | **Concentration of ZIF -8 in MEA** | **Temp.(℃)** | **Cblend (mol/L)** | **VCO2 (L)** | **VCO2,Saturated (L)** | **δ (mole CO2/mole amine)** | **% Loading** |  |
| --- | --- | --- | --- | --- | --- | --- | --- | --- | --- |
|  |
|  |  | 0.25 | 28 | 5 | 0.0684 | 0.001 | 0.58664 | 8.663873817 |  |
|  | 0.25 | 28 | 5 | 0.0682 | 0.001 | 0.58492 | 8.49234 |  |
|  | 0.25 | 28 | 5 | 0.0689 | 0.001 | 0.59093 | 9.09270 |  |
|  | 0.5 | 28 | 5 | 0.077 | 0.001 | 0.66040 | 16.03974 |  |
|  | 0.5 | 28 | 5 | 0.0772 | 0.001 | 0.66211 | 16.21127 |  |
|  | 0.5 | 28 | 5 | 0.0786 | 0.001 | 0.67412 | 17.41200 |  |
| ZS1 | 0.75 | 28 | 5 | 0.088 | 0.001 | 0.75474 | 25.47399 |  |
|  | 0.75 | 28 | 5 | 0.087 | 0.001 | 0.74616 | 24.61633 |  |
|  | 0.75 | 28 | 5 | 0.089 | 0.001 | 0.76332 | 26.33165 |  |
|  | 1 | 28 | 5 | 0.0995 | 0.001 | 0.85337 | 35.33707 |  |
|  | 1 | 28 | 5 | 0.099 | 0.001 | 0.84908 | 34.90824 |  |
|  | 1 | 28 | 5 | 0.102 | 0.001 | 0.87481 | 37.48122 |  |
|  | 0.25 | 28 | 5 | 0.071 | 0.001 | 0.60894 | 10.89379 |  |
|  | 0.25 | 28 | 5 | 0.072 | 0.001 | 0.61751 | 11.75145 |  |
|  | 0.25 | 28 | 5 | 0.0691 | 0.001 | 0.59264 | 9.26424 |  |
|  | 0.5 | 28 | 5 | 0.081 | 0.001 | 0.69470 | 19.47038 |  |
|  | 0.5 | 28 | 5 | 0.082 | 0.001 | 0.70328 | 20.32804 |  |
| ZS2 | 0.5 | 28 | 5 | 0.083 | 0.001 | 0.71186 | 21.18569 |  |
|  | 0.75 | 28 | 5 | 0.088 | 0.001 | 0.75474 | 25.47399 |  |
|  | 0.75 | 28 | 5 | 0.089 | 0.001 | 0.76332 | 26.33165 |  |
|  | 0.75 | 28 | 5 | 0.09 | 0.001 | 0.77189 | 27.18931 |  |
|  | 1 | 28 | 5 | 0.102 | 0.001 | 0.87481 | 37.48122 |  |
|  | 1 | 28 | 5 | 0.103 | 0.001 | 0.88339 | 38.33887 |  |
|  | 1 | 28 | 5 | 0.102 | 0.001 | 0.87481 | 37.48122 |  |
|  |  | 0.25 | 28 | 5 | 0.071 | 0.001 | 0.60894 | 10.89379 |  |
|  | 0.25 | 28 | 5 | 0.072 | 0.001 | 0.61751 | 11.75145 |  |
| ZS3 | 0.25 | 28 | 5 | 0.071 | 0.001 | 0.60894 | 10.89379 |  |
|  | 0.5 | 28 | 5 | 0.081 | 0.001 | 0.69470 | 19.47038 |  |
|  | 0.5 | 28 | 5 | 0.08 | 0.001 | 0.68613 | 18.61272 |  |
|  | 0.5 | 28 | 5 | 0.0812 | 0.001 | 0.69642 | 19.64191 |  |
|  | 0.75 | 28 | 5 | 0.09 | 0.001 | 0.77189 | 27.18931 |  |
|  | 0.75 | 28 | 5 | 0.092 | 0.001 | 0.78905 | 28.90463 |  |
|  | 0.75 | 28 | 5 | 0.093 | 0.001 | 0.79762 | 29.76228 |  |
|  | 1 | 28 | 5 | 0.107 | 0.001 | 0.91770 | 41.76951 |  |
|  | 1 | 28 | 5 | 0.107 | 0.001 | 0.91770 | 41.76951 |  |
|  | 1 | 28 | 5 | 0.105 | 0.001 | 0.90054 | 40.05419 |  |

**Supplementary data for ZCAF samples**

| **Sr.No** | **Samples** | **Concentration of ZIF -8 in MEA** | **Temp.(℃)** | **Cblend (mol/L)** | **VCO2 (L)** | **VCO2,Saturated (L)** | **δ (mole CO2/mole amine)** | **% Loading** |  |
| --- | --- | --- | --- | --- | --- | --- | --- | --- | --- |
|  |
|  |  | 0.25 | 28 | 5 | 0.0638 | 0.001 | 0.54719 | 4.71864 |  |
|  | 0.25 | 28 | 5 | 0.0637 | 0.001 | 0.54633 | 4.63288 |  |
|  | 0.25 | 28 | 5 | 0.0642 | 0.001 | 0.55062 | 5.06171 |  |
|  | 0.5 | 28 | 5 | 0.0697 | 0.001 | 0.59779 | 9.77883 |  |
|  | 0.5 | 28 | 5 | 0.0694 | 0.001 | 0.59522 | 9.52153 |  |
|  | 0.5 | 28 | 5 | 0.0703 | 0.001 | 0.60293 | 10.29343 |  |
| ZCAF 1 | 0.75 | 28 | 5 | 0.0721 | 0.001 | 0.61837 | 11.83721 |  |
|  | 0.75 | 28 | 5 | 0.0723 | 0.001 | 0.62009 | 12.00874 |  |
|  | 0.75 | 28 | 5 | 0.0717 | 0.001 | 0.61494 | 11.49415 |  |
|  | 1 | 28 | 5 | 0.0771 | 0.001 | 0.66126 | 16.12551 |  |
|  | 1 | 28 | 5 | 0.0765 | 0.001 | 0.65611 | 15.61091 |  |
|  | 1 | 28 | 5 | 0.078 | 0.001 | 0.66897 | 16.89740 |  |
|  | 0.25 | 28 | 5 | 0.0652 | 0.001 | 0.55919 | 5.91937 |  |
|  | 0.25 | 28 | 5 | 0.0655 | 0.001 | 0.56177 | 6.17666 |  |
|  | 0.25 | 28 | 5 | 0.0644 | 0.001 | 0.55233 | 5.23324 |  |
|  | 0.5 | 28 | 5 | 0.0732 | 0.001 | 0.62781 | 12.78064 |  |
|  | 0.5 | 28 | 5 | 0.0724 | 0.001 | 0.62095 | 12.09451 |  |
| ZCAF 2 | 0.5 | 28 | 5 | 0.0717 | 0.001 | 0.61494 | 11.49415 |  |
|  | 0.75 | 28 | 5 | 0.074 | 0.001 | 0.63467 | 13.46676 |  |
|  | 0.75 | 28 | 5 | 0.075 | 0.001 | 0.64324 | 14.32442 |  |
|  | 0.75 | 28 | 5 | 0.073 | 0.001 | 0.62609 | 12.60911 |  |
|  | 1 | 28 | 5 | 0.078 | 0.001 | 0.66897 | 16.89740 |  |
|  | 1 | 28 | 5 | 0.079 | 0.001 | 0.67755 | 17.75506 |  |
|  | 1 | 28 | 5 | 0.0798 | 0.001 | 0.68441 | 18.44119 |  |
|  |  | 0.25 | 28 | 5 | 0.0648 | 0.001 | 0.55576 | 5.57630 |  |
|  | 0.25 | 28 | 5 | 0.0659 | 0.001 | 0.56520 | 6.51973 |  |
| ZCAF 3 | 0.25 | 28 | 5 | 0.0649 | 0.001 | 0.55662 | 5.66207 |  |
|  | 0.5 | 28 | 5 | 0.0712 | 0.001 | 0.61065 | 11.06532 |  |
|  | 0.5 | 28 | 5 | 0.0715 | 0.001 | 0.61323 | 11.32262 |  |
|  | 0.5 | 28 | 5 | 0.072 | 0.001 | 0.61751 | 11.75145 |  |
|  | 0.75 | 28 | 5 | 0.075 | 0.001 | 0.64324 | 14.32442 |  |
|  | 0.75 | 28 | 5 | 0.0745 | 0.001 | 0.63896 | 13.89559 |  |
|  | 0.75 | 28 | 5 | 0.0752 | 0.001 | 0.64496 | 14.49595 |  |
|  | 1 | 28 | 5 | 0.08 | 0.001 | 0.68613 | 18.61272 |  |
|  | 1 | 28 | 5 | 0.0797 | 0.001 | 0.68355 | 18.35542 |  |
|  | 1 | 28 | 5 | 0.0799 | 0.001 | 0.68527 | 18.52695 |  |
